# Supplementary material for: Prevalence of Pulmonary Arterial Hypertension in Korean Adult Patients with Systemic Sclerosis: Result of a Pilot Echocardiographic Screening Study
Source: PubMed Central journal article supplement — J Cardiovasc Ultrasound. 2016 Dec 28;24(4):312–6. doi: 10.4250/jcu.2016.24.4.312 (PMC5234342; doi:10.4250/jcu.2016.24.4.312), 2016-12-28
Supplement: jcu-24-312-s001.pdf [file jcu-24-312-s001.pdf]

**Supplementary Table 1.** Comparison of clinical and laboratory characteristics according to the presence of PAH

| Characteristics                       | Non PAH (n = 28) | Confirmed PAH (n = 4)      |
|---------------------------------------|------------------|----------------------------|
| <b>Demographics</b>                   |                  |                            |
| Female, n (%)                         | 24 (85.7)        | 4 (100)                    |
| Age (years)                           | 53.0 (34–71)     | 58.5 (40–73)               |
| Body mass index (kg/m <sup>2</sup> )  | 22.9 (15.8–28.5) | 19.8 (16.8–22.9)           |
| <b>SSc characteristics</b>            |                  |                            |
| Disease duration (month)              | 73.0 (3–264)     | 146.3 (120–192)            |
| Subtype, n (%)                        |                  |                            |
| Diffuse                               | 18 (64.3)        | 3 (75.0)                   |
| Limited                               | 10 (35.7)        | 1 (25.0)                   |
| Raynaud's phenomenon, n (%)           | 28 (100)         | 4 (100)                    |
| Sclerodactyly, n (%)                  | 23 (82.1)        | 2 (50.0)                   |
| Telangiectasia, n (%)                 | 1 (3.6)          | 1 (25.0)                   |
| Digital ulcer, n (%)                  | 6 (21.4)         | 1 (25.0)                   |
| Interstitial lung disease, n (%)      | 11 (39.3)        | 3 (75.0)                   |
| Reflux symptom, n (%)                 | 20 (71.4)        | 3 (75.0)                   |
| Dyspnea (WHO functional class), n (%) |                  |                            |
| 0                                     | 17 (60.7)        | 0                          |
| 1                                     | 5 (17.9)         | 0                          |
| 2                                     | 4 (14.3)         | 1 (25.0)                   |
| 3                                     | 2 (7.1)          | 3 (75.0)*                  |
| 4                                     | 0 (0)            | 0 (0)                      |
| <b>Serum markers</b>                  |                  |                            |
| ANA titer                             | 989 (40–1280)    | 853 (640–1280)             |
| Anti-Scl-70 Ab positivity, n (%)      | 14/22 (63.6)     | 2/2 (100.0)                |
| Anti-centromere Ab positivity, n (%)  | 2/9 (22.2)       | 0/0                        |
| <b>Echocardiographic data</b>         |                  |                            |
| LVEF (%)                              | 60.6 (57–65)     | 53.0 (53–53)               |
| TR Vmax (m/s)                         | 2.7 (2.1–3.1)    | 3.4 (3.2–3.8) <sup>†</sup> |
| TR Vmax (m/s), n (%)                  |                  |                            |
| ≤ 2.8                                 | 23 (82.1)        | 0 (0)                      |
| > 2.8 to ≤ 3.4                        | 5 (17.9)         | 3 (75.0)                   |
| > 3.4                                 | 0 (0)            | 1 (25.0)                   |

Patients with suspected PAH who were not confirmed by the right heart catheterization were excluded in this analysis. \**p* value less than 0.05, <sup>†</sup>*p* value less than 0.01. PAH: pulmonary arterial hypertension, SSc: systemic sclerosis, WHO: World Health Organization, ANA: antinuclear antibody, LVEF: left ventricular ejection fraction, TR Vmax: maximal tricuspid regurgitation velocity
